# Supplementary material for: Joint associations between objectively measured physical activity volume and intensity with body fatness: the Fenland study
Source: Springer Nature journal article supplement (doi:10.1038/s41366-021-00970-8), 2021-09-30
Supplement: MOESM10 [file 41366_2021_970_MOESM10_ESM.pdf]

**Supplementary Table 5: Relationship between isocaloric pairwise ILR coordinates and body fat percentage**

|                                                                       | Women n = 6148 |        |        |       | Men = 5320 |        |        |       |
|-----------------------------------------------------------------------|----------------|--------|--------|-------|------------|--------|--------|-------|
|                                                                       | coef           | se     | tstat  | pval  | coef       | se     | tstat  | pval  |
| <b>Physical Activity Energy Expenditure</b>                           | -0.13***       | (0.01) | -15.95 | 0.00  | -0.08***   | (0.01) | -11.51 | 0.00  |
| <b>Composition of intensity (Full ILR coordinate set)</b>             | -              | -      | -      | 0.00† | -          | -      | -      | 0.00† |
| <b>Pairwise reallocation - SS to LPA</b>                              |                |        |        |       |            |        |        |       |
| $ilr_1 \propto \ln(\text{LPA} \& \text{SS}:\text{MPA} \& \text{VPA})$ | 0.56***        | (0.15) | 3.73   | 0.00  | 0.64***    | (0.17) | 3.81   | 0.00  |
| $ilr_2 \propto \ln(\text{LPA}:\text{SS})$                             | 0.78***        | (0.24) | 3.23   | 0.00  | 1.56***    | (0.22) | 7.18   | 0.00  |
| $ilr_3 \propto \ln(\text{MPA}:\text{VPA})$                            | 0.63***        | (0.12) | 5.07   | 0.00  | 0.36***    | (0.14) | 2.66   | 0.01  |
| <b>Pairwise reallocation - SS to MPA</b>                              |                |        |        |       |            |        |        |       |
| $ilr_1 \propto \ln(\text{MPA} \& \text{SS}:\text{LPA} \& \text{VPA})$ | -0.10          | (0.21) | -0.48  | 0.63  | -0.85***   | (0.20) | -4.17  | 0.00  |
| $ilr_2 \propto \ln(\text{MPA}:\text{SS})$                             | 0.31*          | (0.17) | 1.85   | 0.06  | 0.50***    | (0.18) | 2.78   | 0.01  |
| $ilr_3 \propto \ln(\text{LPA}:\text{VPA})$                            | 1.10***        | (0.15) | 7.47   | 0.00  | 1.41***    | (0.14) | 10.10  | 0.00  |
| <b>Pairwise reallocation - SS to VPA</b>                              |                |        |        |       |            |        |        |       |
| $ilr_1 \propto \ln(\text{VPA} \& \text{SS}:\text{MPA} \& \text{LPA})$ | -0.99***       | (0.16) | -6.03  | 0.00  | -1.36***   | (0.16) | -8.72  | 0.00  |
| $ilr_2 \propto \ln(\text{VPA}:\text{SS})$                             | -0.32***       | (0.12) | -2.60  | 0.01  | 0.14       | (0.11) | 1.28   | 0.20  |
| $ilr_3 \propto \ln(\text{MPA}:\text{LPA})$                            | -0.47**        | (0.23) | -2.03  | 0.04  | -1.05***   | (0.24) | -4.41  | 0.00  |
| <b>Pairwise reallocation - LPA to MPA</b>                             |                |        |        |       |            |        |        |       |
| $ilr_1 \propto \ln(\text{MPA} \& \text{LPA}:\text{SS} \& \text{VPA})$ | 0.99***        | (0.16) | 6.03   | 0.00  | 1.36***    | (0.16) | 8.72   | 0.00  |
| $ilr_2 \propto \ln(\text{MPA}:\text{LPA})$                            | -0.47**        | (0.23) | -2.03  | 0.04  | -1.05***   | (0.24) | -4.41  | 0.00  |
| $ilr_3 \propto \ln(\text{SS}:\text{VPA})$                             | 0.32***        | (0.12) | 2.60   | 0.01  | -0.14      | (0.11) | -1.28  | 0.20  |
| <b>Pairwise reallocation - LPA to VPA</b>                             |                |        |        |       |            |        |        |       |
| $ilr_1 \propto \ln(\text{VPA} \& \text{LPA}:\text{SS} \& \text{MPA})$ | 0.10           | (0.21) | 0.48   | 0.63  | 0.85***    | (0.20) | 4.17   | 0.00  |
| $ilr_2 \propto \ln(\text{VPA}:\text{LPA})$                            | -1.10***       | (0.15) | -7.47  | 0.00  | -1.41***   | (0.14) | -10.10 | 0.00  |
| $ilr_3 \propto \ln(\text{SS}:\text{MPA})$                             | -0.31*         | (0.17) | -1.85  | 0.06  | -0.50***   | (0.18) | -2.78  | 0.01  |
| <b>Pairwise reallocation - MPA to VPA</b>                             |                |        |        |       |            |        |        |       |
| $ilr_1 \propto \ln(\text{MPA} \& \text{VPA}:\text{SS} \& \text{LPA})$ | -0.56***       | (0.15) | -3.73  | 0.00  | -0.64***   | (0.17) | -3.81  | 0.00  |
| $ilr_2 \propto \ln(\text{VPA}:\text{MPA})$                            | -0.63***       | (0.12) | -5.07  | 0.00  | -0.36***   | (0.14) | -2.66  | 0.01  |
| $ilr_3 \propto \ln(\text{SS}:\text{LPA})$                             | -0.78***       | (0.24) | -3.23  | 0.00  | -1.56***   | (0.22) | -7.18  | 0.00  |

\*\*\* p<0.01, \*\* p<0.05, \* p<0.1. SS = Sedentary or sleep, LPA = Light physical activity, MPA = Moderate physical activity, VPA = Vigorous physical activity.

† Likelihood ratio test for contribution of relative intensity composition
